# Supplementary material for: Introduction and geographic availability of new antibiotics approved between 1999 and 2014
Source: PubMed Central journal article supplement (PMC6191083; doi:10.1371/journal.pone.0205166), 2018-10-16
Supplement: pone.0205166.s001.pdf [file pone.0205166.s001.pdf]

**S1 Table. Indications for the 25 NCEs grouped in 12 main indication groups**

| ATC-code      | NCE                                     | Community acquired respiratory tract infections <sup>1</sup> | Nosocomial respiratory tract infections <sup>2</sup> | Skin and soft tissue infections <sup>3</sup> | Urinary tract infections <sup>4</sup> | Complicated intra-abdominal infections | Bloodstream infections (bacteremia) | Right-side infective endocarditis | Secondary infection after trauma, burn or surgical wounds | Osteitis | Plague   | Reproductive tract infections <sup>5</sup> | Gonorrhea |
|---------------|-----------------------------------------|--------------------------------------------------------------|------------------------------------------------------|----------------------------------------------|---------------------------------------|----------------------------------------|-------------------------------------|-----------------------------------|-----------------------------------------------------------|----------|----------|--------------------------------------------|-----------|
| none          | antofloxacin                            | 1                                                            |                                                      |                                              | 1                                     |                                        |                                     |                                   | 1                                                         |          |          |                                            |           |
| none          | balofloxacin                            | 1                                                            |                                                      |                                              | 1                                     |                                        |                                     |                                   |                                                           |          |          |                                            |           |
| J01DH05       | biapenem <sup>6</sup>                   | 1                                                            |                                                      |                                              | 1                                     | 1                                      | 1                                   |                                   |                                                           |          |          |                                            |           |
| J01DI02       | ceftaroline                             | 1                                                            |                                                      | 1                                            |                                       |                                        |                                     |                                   |                                                           |          |          |                                            |           |
| J01DI01       | ceftobiprole <sup>7</sup>               | 1                                                            | 1                                                    | 1                                            |                                       |                                        |                                     |                                   |                                                           |          |          |                                            |           |
| J01DI54       | ceftolozane                             |                                                              |                                                      |                                              | 1                                     | 1                                      |                                     |                                   |                                                           |          |          |                                            |           |
| J01XA04       | dalbavancin                             |                                                              |                                                      | 1                                            |                                       |                                        |                                     |                                   |                                                           |          |          |                                            |           |
| J01XX09       | daptomycin <sup>8</sup>                 |                                                              |                                                      | 1                                            |                                       |                                        | 1                                   | 1                                 |                                                           |          |          |                                            |           |
| J01DH04       | doripenem <sup>9</sup>                  |                                                              | 1                                                    |                                              | 1                                     | 1                                      |                                     |                                   |                                                           |          |          |                                            |           |
| J01DH03       | ertapenem <sup>10</sup>                 | 1                                                            |                                                      | 1                                            | 1                                     | 1                                      |                                     |                                   |                                                           |          |          | 1                                          |           |
| J01MA19       | garenoxacin                             | 1                                                            |                                                      | 1                                            |                                       | 1                                      |                                     |                                   |                                                           |          |          | 1                                          |           |
| J01MA16       | gatifloxacin                            | 1                                                            |                                                      |                                              | 1                                     |                                        |                                     |                                   |                                                           |          |          |                                            | 1         |
| J01MA15       | gemifloxacin <sup>11</sup>              | 1                                                            |                                                      |                                              | 1                                     |                                        |                                     |                                   |                                                           |          |          |                                            |           |
| J01XX08       | linezolid <sup>12</sup>                 | 1                                                            | 1                                                    | 1                                            |                                       |                                        |                                     |                                   |                                                           |          |          |                                            |           |
| J01MA14       | moxifloxacin <sup>13</sup>              | 1                                                            |                                                      | 1                                            |                                       | 1                                      |                                     |                                   |                                                           |          | 1        | 1                                          |           |
| J01XA05       | oritavancin                             |                                                              |                                                      | 1                                            |                                       |                                        |                                     |                                   |                                                           |          |          |                                            |           |
| J01MA18       | pazufloxacin                            | 1                                                            |                                                      |                                              | 1                                     | 1                                      |                                     |                                   | 1                                                         |          |          | 1                                          |           |
| J01MA17       | prulifloxacin                           | 1                                                            |                                                      | 1                                            | 1                                     | 1                                      |                                     |                                   | 1                                                         |          |          | 1                                          |           |
| J01FG02       | quinupristin/dalfopristin <sup>14</sup> | 1                                                            |                                                      | 1                                            | 1                                     | 1                                      |                                     |                                   |                                                           |          |          |                                            |           |
| J01MA21       | sitafloxacin                            | 1                                                            |                                                      |                                              | 1                                     |                                        |                                     |                                   |                                                           | 1        |          | 1                                          |           |
| none          | tebipenem                               | 1                                                            |                                                      |                                              |                                       |                                        |                                     |                                   |                                                           |          |          |                                            |           |
| J01XX11       | tedizolid                               |                                                              |                                                      | 1                                            |                                       |                                        |                                     |                                   |                                                           |          |          |                                            |           |
| J01XA03       | telavancin <sup>15</sup>                |                                                              | 1                                                    | 1                                            |                                       |                                        |                                     |                                   |                                                           |          |          |                                            |           |
| J01FA15       | telithromycin <sup>16</sup>             | 1                                                            |                                                      |                                              |                                       |                                        |                                     |                                   |                                                           |          |          |                                            |           |
| J01AA12       | tigecycline <sup>17</sup>               | 1                                                            |                                                      | 1                                            |                                       | 1                                      |                                     |                                   |                                                           |          |          |                                            |           |
| <b>Total:</b> |                                         | <b>18</b>                                                    | <b>4</b>                                             | <b>14</b>                                    | <b>12</b>                             | <b>10</b>                              | <b>2</b>                            | <b>1</b>                          | <b>3</b>                                                  | <b>1</b> | <b>1</b> | <b>6</b>                                   | <b>1</b>  |

1. Community acquired respiratory tract infections include community acquired pneumonia, acute exacerbation of chronic bronchitis, acute maxillary sinusitis, pharyngitis/tonsillitis

2. Nosocomial respiratory tract infections include nosocomial pneumonia, hospital-acquired pneumonia (HAP)/ ventilator-acquired pneumonia (VAP)

3. Skin infections include acute bacterial skin and soft tissue infections, uncomplicated skin and soft tissue infections, complicated skin and soft tissue infections
4. Urinary tract infections include uncomplicated urinary tract infections, complicated urinary tract infections, pyelonephritis
5. Reproductive tract infections include mild to moderate pelvic inflammatory disease, acute pelvic infections including postpartum endomyometritis, septic abortion and post-surgical gynecologic infections
6. Indications include the indications listed on ATC-application to the WHOCC
7. EMA rejected skin and soft tissue infections as an indication in 2010, indication was approved by Sweden in 2013 and Canada in 2015
8. FDA added blood stream infections in 2006
9. EMA approved VAP as an indication in 2008, sent out warning in 2012 that dosage might not be enough to treat VAP. FDA removed VAP as an indication
10. Approved for urinary tract infections by the FDA
11. FDA changed the indication for penicillin- resistant infections to multi- drug resistant infections in 2004
12. Mutual recognition approval in Europe. Sweden and UK did not add uncomplicated skin infections as an indication
13. FDA added plague as an indication based on in vitro studies. EMA have not approved intra-abdominal infections as an indication. FDA changed the indication for penicillin- resistant infections to multi- drug resistant infections in 2005
14. FDA removed VREF as an indication in 2010, Sweden and Canada took it off market in 2008
15. EMA have not approved skin infections as an indication due to concerns for kidney toxicity but approved for MRSA in nosocomial pneumonia due to lack of alternative treatments
16. FDA removed indications for chronic bronchitis or sinusitis in 2007 due to liver toxicity but indications for community acquired pneumonia was kept. The company took the product off the market shortly after. EMA decided to keep these indications only to be used” in the event of resistance also indicated for tonsillitis, sinusitis, exacerbation for chronic exacerbation.
17. Community acquired pneumonia and intra-abdominal infections were added by the FDA in 2009. EMA and Canada have not approved community acquired pneumonia as an indication
