# Supplementary material for: Introduction and geographic availability of new antibiotics approved between 1999 and 2014
Source: PubMed Central journal article supplement (PMC6191083; doi:10.1371/journal.pone.0205166), 2018-10-16
Supplement: pone.0205166.s003.pdf [file pone.0205166.s003.pdf]

**S3 Table. EMA and FDA market authorization dates**

| NCE                        | EMA market authorization: centralized authorization procedure | FDA market authorization |
|----------------------------|---------------------------------------------------------------|--------------------------|
| antofloxacin               | no application                                                | -                        |
| balofloxacin               | no application                                                | -                        |
| Biapenem                   | no application                                                | -                        |
| ceftaroline                | 23.08.2012                                                    | 29.10.2010               |
| ceftobiprole               | Refused (16.09.2010)                                          | -                        |
| ceftolozane                | 18.09.2015                                                    | 19.12.2014               |
| dalbavancin                | 19.02.2015                                                    | 23.05.2014               |
| dalfopristin/ quinupristin | no application                                                | 21.09.1999               |
| daptomycin                 | 19.01.2006                                                    | 12.09.2003               |
| doripenem                  | 25.07.2008                                                    | 12.10.2007               |
| ertapenem                  | 18.04.2002                                                    | 21.11.2001               |
| garenoxacin                | Refused (25.07.2007)                                          | -                        |
| gatifloxacin               | no application                                                | Withdrawn (2006)         |
| gemifloxacin               | Refused (17.06.2009)                                          | 04.04.2003               |
| linezolid                  | no application                                                | 18.04.2000               |
| moxifloxacin               | no application                                                | 10.12.1999               |
| oritavancin                | 19.03.2015                                                    | 06.08.2014               |
| pazufloxacin               | no application                                                | -                        |
| prulifloxacin              | no application                                                | -                        |
| sitafoxacin                | no application                                                | -                        |
| tebipenem                  | no application                                                | -                        |
| tedizolid                  | 23.03.2015                                                    | 20.06.2014               |
| telavancin                 | 02.09.2011                                                    | 11.09.2009               |
| telithromycin              | 09.07.2001                                                    | 01.04.2004               |
| tigecycline                | 24.04.2006                                                    | 15.06.2005               |

EMA and FDA market authorization dates. FDA does not report on NCEs not authorized. European countries have registered sales of ceftobiprole, dalofopristin/quinupristin, gatifloxacin, gemifloxacin, linezolid, moxifloxacin, and prulifloxacin, indicating that these NCEs have been approved through the mutual recognition procedure. Doripenem and telithromycin were later withdrawn from market by the pharmaceutical companies holding the market authorization.
