# Supplementary material for: Introduction and geographic availability of new antibiotics approved between 1999 and 2014
Source: PubMed Central journal article supplement (PMC6191083; doi:10.1371/journal.pone.0205166), 2018-10-16
Supplement: pone.0205166.s004.pdf [file pone.0205166.s004.pdf]

**S4 Table. Company size measured in net sales and number of employees**

| NCE                           | Product name | MA year | Originator             | USD million | Employees | Developed and marketed by          | USD millions                         | Employees                       | Total number of countries entered |
|-------------------------------|--------------|---------|------------------------|-------------|-----------|------------------------------------|--------------------------------------|---------------------------------|-----------------------------------|
| moxifloxacin                  | Avelox®      | 1999    | Bayer                  | 7444.97     | 120400    | Bayer                              | 7639.93                              | 120400                          | 75                                |
| linezolid                     | Zyvox®       | 2000    | Pharmacia              | 9314.00     | 44300     | Pharmacia                          | 13837.00                             | no data                         | 70                                |
| ertapenem                     | Invanz®      | 2002    | Astra Zeneca           | 17841.00    | 15000     | Merck                              | 19946.20                             | 77300                           | 65                                |
| tigecycline                   | Tygacil®     | 2005    | Wyeth                  | 17875.00    | 49732     | Wyeth                              | 17875.00                             | 49732 (2005)                    | 65                                |
| daptomycin                    | Cubicin®     | 2003    | Eli Lilly              | 11855.90    | 46100     | Cubist                             | 3.716                                | 290                             | 47                                |
| doripenem                     | Finibax®     | 2005    | Shionogi               | 1531.35     | 4293      | Shinogi/ Peninsula (owned by J&J)  | 22322.00 (J&J)                       | 115600 (J&J)                    | 44                                |
| telithromycin                 | Ketek®       | 2001    | Aventis                | 15726.35    | no data   | Aventis                            | 16138.19                             | no data                         | 43                                |
| ceftaroline                   | Teflaro®     | 2010    | Takeda                 | 17212.25    | 19654     | Forest Laboratories Inc.           | 3903.52                              | 5000                            | 31                                |
| gatifloxacin                  | Tequin®      | 1999    | Kyorin Pharmaceuticals | 379.43      | 1000      | Bristol-Myers Squibb               | 16000.00                             | 54500                           | 30                                |
| gemifloxacin                  | Factive®     | 2003    | LG Life Sciences       | 6813.65     | no data   | Oscient                            | 6.612                                | 94                              | 28                                |
| dalfopristin/<br>quinupristin | Synercid®    | 1999    | Rhone-Poulenc-Rorer    | 4677.78     | 65180     | Aventis                            | 4456.86                              | 65180                           | 21                                |
| prulifloxacin                 | Sword®       | 2002    | Nippon Shinyaku        | 342.15      | 1800      | Nippon Shinyaku and Meiji Seika    | 903.96                               | 4418 (Meiji)                    | 14                                |
| ceftobiprole                  | Zeftera®     | 2008    | Roche                  | 18309.66    | 54141     | Basilea/ J&J                       | 9.91 (Basilea) 24567.00 (pharma J&J) | 300 (Basilea) 118700 (J&J)      | 5                                 |
| balofloxacin                  | Q-roxin®     | 2002    | Chugai Pharmaceutical  | 1900.73     | 6282      | Choongwae (now JW Pharmaceuticals) | 345.07                               | no data                         | 3                                 |
| biapenem                      | Omegacin®    | 2002    | Wyeth KK (Wyeth)       | 14584.04    | 52762     | Meiji Seika                        | 903.96                               | 4418                            | 3                                 |
| pazufloxacin                  | Pasil®       | 2002    | Toyama Chemical        | 0.2315      | 1662      | Toyama Chemical/Mitsubishi         | 1869.98                              | 5339 (Mitsubishi)               | 3                                 |
| garenoxacin                   | Geninax®     | 2007    | Toyama Chemical        | 0.15        | 1025      | Toyama /Taisho/Astellas            | 836.23 (Taisho) 8314.86 (Astellas)   | 5327 (Taisho) 13 900 (Astellas) | 2                                 |
| sitafoxacin                   | Gracevit®    | 2008    | Daiichi Sankyo         | 8929.42     | 28895     | DaiichiSankyo                      | 7972.26                              | 28895                           | 2                                 |
| tedizolid                     | Sivextro®    | 2014    | Dong-A Pharmaceutical  | 401.64      | 2563      | Cubist                             | 1054.44                              | 873                             | 2                                 |

|                        |           |      |                                      |          |          |                               |          |                  |   |
|------------------------|-----------|------|--------------------------------------|----------|----------|-------------------------------|----------|------------------|---|
| antofloxacin           | 优朋®       | 2010 | Shanghai Institute Of Materia Medica | academia | academia | Anhui global pharmaceutical   | academia | academia         | 1 |
| ceftolozane/tazobactam | Zerbaxa®  | 2014 | Astellas                             | 9836.04  | 17649    | Cubist                        | 1054.44  | 873              | 1 |
| dalbavancin            | Dalvance® | 2014 | Vicuron Pharmaceuticals              | 8.372    | no data  | Durata (spin off from Pfizer) | 0.00     | 68 (Durata)      | 1 |
| oritavancin            | Nuvocid®  | 2014 | Eli Lilly                            | 17269.00 | 39135    | The Medicines Company         | 724.40   | 727              | 1 |
| tebipenem              | Orapenem® | 2009 | Wyeth K.K (Wyeth)                    | 19025.4  | no data  | Meiji Seika Pharma            | 1468.38  | 14168            | 1 |
| telavancin             | Vibativ®  | 2009 | Theravance                           | 24.37    | 194      | Theravance/Astellas           | 11110.55 | 15161 (Astellas) | 1 |

Net sales in USD (in millions) and number of employees the year of market entry, of the companies in charge of development and marketing of the NCEs.
